# Supplementary material for: Paired box 2 promotes progression of endometrial cancer via regulating cell cycle pathway
Source: PubMed Central journal article supplement — J Cancer. 2018 Sep 25;9(20):3743–54. doi: 10.7150/jca.22418 (PMC6216001; doi:10.7150/jca.22418), 2018-09-25
Supplement: jcav09p3743s1.pdf [file jcav09p3743s1.pdf]

**Table S1.** Primer sequences

|       | sense                           | antisense                           |
|-------|---------------------------------|-------------------------------------|
| CDK1  | 5'- TAGAAAGTGAAGAGGAAGGGGTTC-3' | 5'-<br>TAGAAAGTGAAGAGGAAGGGGTTC-3'  |
| YWHAZ | 5'- CGTACTTGGCTGAGGTTGC-3'      | 5'- GTCTGATAGGATGTGTTGGTTGC-3'      |
| SUM1  | 5'-CAGTGTGGTGCCTCCATCTC-3'      | 5'-<br>TTAATATGCCTGCTCAGTTGTGTAG-3' |
| GAPDH | 5'-CGGAGTCAACGGATTTGGTCGTAT-3'  | 5'-AGCCTTCTCCATGGTGGTGAAGAC-3'      |

**Table S2.** KEGG pathways showing gene enrichment. (up-regulation)

| Pathway                                 | Size (gene) | Genes contain pathway | Enrichment score | p-val     |
|-----------------------------------------|-------------|-----------------------|------------------|-----------|
| Fanconi anemia pathway                  | 9           | 54                    | 9.45860285       | 1.64E-06  |
| Transcriptional misregulation in cancer | 14          | 180                   | 4.41401466       | 1.72E-05  |
| Metabolic pathways                      | 43          | 1189                  | 2.0524134        | 6.02E-05  |
| Cell cycle                              | 9           | 124                   | 4.11906898       | 0.0014662 |
| Terpenoid backbone biosynthesis         | 4           | 21                    | 10.8098318       | 0.0018035 |
| RNA transport                           | 10          | 165                   | 3.43949194       | 0.0029472 |
| Ubiquitin mediated proteolysis          | 9           | 138                   | 3.70119242       | 0.0031883 |
| Oocyte meiosis                          | 8           | 112                   | 4.05368693       | 0.0034142 |
| Gap junction                            | 7           | 89                    | 4.46361033       | 0.0040544 |
| Homologous recombination                | 4           | 28                    | 8.10737387       | 0.0055955 |
| PI3K-Akt signaling pathway              | 15          | 347                   | 2.45323993       | 0.0057125 |
| Pathogenic Escherichia coli infection   | 5           | 55                    | 5.15923792       | 0.0112783 |
| Pyrimidine metabolism                   | 7           | 107                   | 3.71272261       | 0.0117058 |
| Viral carcinogenesis                    | 10          | 207                   | 2.74162401       | 0.0156985 |
| mTOR signaling pathway                  | 5           | 60                    | 4.72930142       | 0.0164797 |
| mRNA surveillance pathway               | 6           | 92                    | 3.70119242       | 0.0232713 |
| RIG-I-like receptor signaling pathway   | 5           | 71                    | 3.99659275       | 0.0335668 |
| Spliceosome                             | 7           | 132                   | 3.00955545       | 0.0364219 |

|                                            |   |     |            |           |
|--------------------------------------------|---|-----|------------|-----------|
| Synthesis and degradation of ketone bodies | 2 | 9   | 12.6114705 | 0.0411321 |
| Epstein-Barr virus infection               | 9 | 204 | 2.50374781 | 0.0426077 |
| Systemic lupus erythematosus               | 7 | 138 | 2.87870521 | 0.0458028 |
| Purine metabolism                          | 8 | 173 | 2.62435224 | 0.0480624 |

**Table S3.** KEGG pathways showing gene enrichment. (down-regulation)

| Pathway                                   | Size(gene) | Genes pathway contain | Enrichment score | p-val     |
|-------------------------------------------|------------|-----------------------|------------------|-----------|
| Olfactory transduction                    | 24         | 408                   | 8.5731874        | 6.55E-15  |
| Chemokine signaling pathway               | 11         | 192                   | 8.3499273        | 4.31E-07  |
| Cytokine-cytokine receptor interaction    | 12         | 267                   | 6.5503005        | 1.58E-06  |
| Rheumatoid arthritis                      | 6          | 94                    | 9.3028204        | 0.0001948 |
| Serotonergic synapse                      | 6          | 114                   | 7.6707466        | 0.0005692 |
| Antigen processing and presentation       | 5          | 82                    | 8.8868406        | 0.0010426 |
| Tuberculosis                              | 7          | 184                   | 5.5446158        | 0.0011988 |
| Natural killer cell mediated cytotoxicity | 6          | 140                   | 6.2461794        | 0.0017263 |
| Autoimmune thyroid disease                | 4          | 56                    | 10.410299        | 0.0024104 |
| Toll-like receptor signaling pathway      | 5          | 108                   | 6.747416         | 0.0036857 |
| Cholinergic synapse                       | 5          | 113                   | 6.4488578        | 0.0045141 |
| Arachidonic acid metabolism               | 4          | 67                    | 8.7011454        | 0.0047418 |
| Influenza A                               | 6          | 179                   | 4.88528          | 0.006189  |
| Alcoholism                                | 6          | 180                   | 4.8581395        | 0.0063663 |
| Asthma                                    | 3          | 34                    | 12.859781        | 0.0065394 |

|                                              |    |      |           |           |
|----------------------------------------------|----|------|-----------|-----------|
| Metabolic pathways                           | 18 | 1189 | 2.206388  | 0.0074125 |
| Herpes simplex infection                     | 6  | 188  | 4.6514102 | 0.0079267 |
| PI3K-Akt signaling pathway                   | 8  | 347  | 3.3600965 | 0.0116776 |
| Neuroactive ligand-receptor interaction      | 7  | 275  | 3.709852  | 0.0122766 |
| Hematopoietic cell lineage                   | 4  | 88   | 6.6247357 | 0.0128947 |
| GABAergic synapse                            | 4  | 90   | 6.4775194 | 0.0139797 |
| Graft-versus-host disease                    | 3  | 45   | 9.7162791 | 0.0146695 |
| Pancreatic secretion                         | 4  | 96   | 6.0726744 | 0.0176033 |
| Intestinal immune network for IgA production | 3  | 51   | 8.5731874 | 0.0208883 |
| Taste transduction                           | 3  | 53   | 8.2496709 | 0.0232622 |
| HIF-1 signaling pathway                      | 4  | 106  | 5.4997806 | 0.0249616 |
| Glutamatergic synapse                        | 4  | 118  | 4.9404809 | 0.0361832 |
| Toxoplasmosis                                | 4  | 122  | 4.7784979 | 0.0405477 |
| Cytosolic DNA-sensing pathway                | 3  | 66   | 6.6247357 | 0.0425738 |

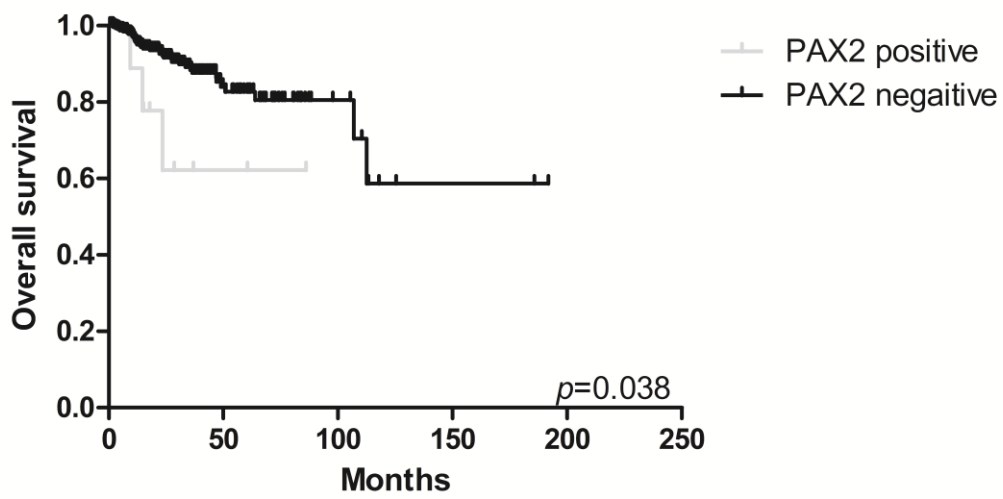

Supplement figure. The overall survival of PAX2 positive patients and PAX2 negative patients in TCGA database.
